1 **ASSOCIATION OF PREDICTED DELETERIOUS SINGLE**  
2 **NUCLEOTIDE POLYMORPHISMS WITH CARCASS TRAITS IN**  
3 **MEAT-TYPE CHICKENS**

4  
5 Priscila Anchieta Trevisoli<sup>\*</sup>; Gabriel Costa Monteiro Moreira<sup>\*</sup>; Clarissa Boschiero<sup>\*</sup>;  
6 Aline Silva Mello Cesar<sup>\*</sup>; Juliana Petrini<sup>\*</sup>; Mônica Corrêa Ledur<sup>†</sup>; Gerson Barreto  
7 Mourão<sup>\*</sup>; Luiz Lehmann Coutinho<sup>\*</sup>

8

9 <sup>\*</sup> Animal Science Department, University of São Paulo (USP) / Luiz de Queiroz College  
10 of Agriculture (ESALQ), Piracicaba, São Paulo, Brazil, 13418-900.

11 <sup>†</sup> Embrapa Suínos e Aves, Concórdia, Santa Catarina, Brazil. 89715-899

12

13

14

15

16

17

18

19

20

21

22

23

24

25

26

27

28

29

30

31

32

33

34

35

36

37

38

39

40

41

42

43

44 Association of predicted deleterious single nucleotide polymorphisms with carcass traits  
45 in meat-type chickens

46

47 Key words: association study; missense SNPs; target sequencing; broilers

48

49 Corresponding author

50 Luiz Lehmann Coutinho

51 Animal Science Department, University of São Paulo, Av. Pádua Dias, N° 11,  
52 Piracicaba, SP, 13418-900, Brazil.

53 E-mail: llcoutinho@usp.br

54 Phone number: +55 19 3429 4434

55

56

#### ABSTRACT

57

58 In previous studies, we used genome wide association (GWAS) to identify  
59 quantitative trait loci (QTL) associated with weight and yield of abdominal fat,  
60 drumstick, thigh and breast traits in chickens. However, this methodology assumes that  
61 the studied variants are in linkage disequilibrium with the causal mutation and  
62 consequently do not identify it. In an attempt to identify causal mutations in candidate  
63 genes for carcass traits in broilers, we selected 20 predicted deleterious SNPs within  
64 QTLs for association analysis. Additive, dominance and allele substitution effects were  
65 tested. From the 20 SNPs analyzed, we identified six SNPs with significant association  
66 (p-value <0.05) with carcass traits, and three are highlighted here. The SNP  
67 rs736010549 was associated with drumstick weight and yield with significant additive  
68 and dominance effects. The SNP rs739508259 was associated with thigh weight and  
69 yield, and with significant additive and allele substitution effects. The SNP

70 rs313532967 was associated with breast weight and yield. The three SNPs that were  
71 associated with carcass traits (rs736010549, rs739508259 and rs313532967) are  
72 respectively located in the coding regions of the *WDR77*, *VWA8* and *BARL* genes. These  
73 genes are involved in biological processes such as steroid hormone signaling pathway,  
74 estrogen binding, and regulation of cell proliferation. Our strategy allowed the  
75 identification of putative casual mutations associated with muscle growth.

76

## 77 BACKGROUND

78 Chicken is an important source of protein for human nutrition and a model system in  
79 growth and developmental biology (Ellegren 2005). The complete genome sequence of  
80 a Red Jungle Fowl female (*Gallus gallus gallus*), that is considered the ancestor of  
81 domestic chicken (*G. g. domesticus*) (Abplanalp 1992; Cassoli 2007; Dodgson *et al.*  
82 2011), was completed in 2004 (Hillier *et al.* 2004) and opened the opportunity to  
83 explore the molecular control of complex phenotypes such as growth and muscle  
84 deposition among other traits.

85 High throughput sequencing of several chicken lines allowed the identification  
86 of millions of single nucleotide polymorphisms (SNPs) in the chicken genome (Rubin *et al.*  
87 2010; Boschiero *et al.* 2018) and develop high density SNP panels (Kranis *et al.*  
88 2013). SNPs are the most common and frequent DNA variant, with approximately 5  
89 SNPs per kilobase (kb) in chicken (Rubin *et al.* 2010). When located in coding and  
90 regulatory regions of genes, they may affect traits of economic interest in animal models  
91 and livestock species (Roux *et al.* 2014).

92 High-density SNP panels were used in genome wide association studies  
93 (GWAS) to identify genomic regions associated with quantitative traits such as body

94 weight (Gu *et al.* 2011a), fatness traits (Sun *et al.* 2013), breast and leg muscle weight,  
95 wing weight (Xie *et al.* 2012), carcass and eviscerated weight (Liu *et al.* 2013).

96 GWAS relies on the linkage disequilibrium of the genetic variant present in the  
97 SNP panel and the casual mutation, so further studies are necessary to identify the  
98 mutation responsible for the phenotype of interest. In an attempt to solve this issue,  
99 statistical evidence, such as association studies combined with functional annotations of  
100 genes and genetic variants, is important to determine he causal mutation (Spain and  
101 Barrett 2015). A SNP that occurs in coding regions can be classified as missense when  
102 the coded amino acid is changed, or synonymous, when the coded amino acid remains  
103 the same. Thereby, missense SNPs can be predicted as deleterious or tolerated by SIFT  
104 tool [Sorting Intolerant From Tolerant, (Ng and Henikoff 2003)]. Changes at well-  
105 conserved positions tend to be deleterious due to the assumption that important amino  
106 acids will be conserved in the protein family. (Ng and Henikoff 2002, 2003). When a  
107 SNP is predicted as a deleterious mutation, it means that the change of amino acids  
108 probably affects the protein structure and function, and consequently, may potentially  
109 alter the phenotype.

110 Using missense SNPs, some previous studies identified associations with body  
111 weight at hatch, semi-eviscerated carcass weight, eviscerated carcass weight, leg muscle  
112 weight and carcass weight (Wang *et al.* 2015), abdominal fat weight, body weight at  
113 different ages and body size traits (Han *et al.* 2012). However, there are no studies in  
114 the literature using predicted deleterious SNPs for association studies to identify casual  
115 mutations. Therefore, in this study we used previously developed whole genome  
116 sequence and GWAS information to identified predicted deleterious SNPs in QTL  
117 regions. Furthermore, we tested the association of these SNP with carcass traits in order  
118 to identify potential causal mutations in broilers.

119

120

## METHODS AND MATERIALS

### 121 **Ethics statement**

122 In this study, all experimental protocols that used animals were performed in  
123 agreement with the resolution number 010/2012 approved by the Embrapa Swine and  
124 Poultry Ethics Committee on Animal Utilization to ensure compliance with  
125 international guidelines for animal welfare.

126

### 127 **Experimental Population**

128 The TT reference population used for this study was generated from an Embrapa  
129 broiler line called TT. The TT line has been under selection since 1992, for many  
130 generations and several traits, with the goals to increase body weight and carcass yield,  
131 improve viability, fertility, hatchability, feed conversion, and reduce abdominal fat  
132 (Rosário *et al.* 2009). The TT Reference Population is an expansion of the TT line and  
133 was developed from crossing 20 males and 92 females (1:5) in five hatches, yielding  
134 approximately 1,500 chickens (Cruz *et al.* 2015; Marchesi *et al.* 2017). From this  
135 population we selected 237 offspring and 37 parental chickens (12 males and 25  
136 females) for target sequencing. The offspring were selected based on the following  
137 criteria: (1) descendent of one of the 14 parental males that we have the whole genome  
138 sequencing data; (2) from families that have between 5 to 7 animals; (3) hatched on the  
139 first three incubations.

140

### 141 **Phenotype measurement**

142           Body weight at 42 days of age (BW42) was measured six hours after fasting.  
143    Blood samples were collected for DNA extraction during the bleeding. After bleeding  
144    feathers were removed mechanically following a hot water bath (60°C for 45 s). The  
145    carcass cuts as breast weight (BTW), thigh weight (THW), drumstick weight (DRW)  
146    and abdominal fat weight (ABFW) were individually measured in grams. Drumstick  
147    yield (DR%), abdominal fat yield (ABF%), thigh yield (TH%) and breast weight (BT%)  
148    were estimated as a percentage of live body weight at 42 days of age (BW42). More  
149    details about the slaughter and phenotypes measurements are available at (Venturini *et*  
150    *al.* 2014; Cruz *et al.* 2015).

151

## 152    **SNPs selection and custom amplicon design**

153           Predicted deleterious SNPs were selected from whole genome re-sequence data  
154    previously generated from 14 of the 37 parental animals of the population used in this  
155    study (TT Reference population). Sequences were generated with an Illumina HiSeq  
156    and SNP identified using SAMtools v.1.2 software (Li *et al.* 2009). Further details about  
157    library preparation, sequencing and filtering are available in Moreira *et al.* (2015) and  
158    Boschiero *et al.* (2018). SNP functional annotation was performed using VEP (Variant  
159    Effect Predictor, McLaren *et al.* 2016) and deleterious prediction was based on SIFT  
160    score prediction (Sorting Intolerant From Tolerant, Ng and Henikoff 2003). All the  
161    SNPs identified are available at EVA-EMBL database  
162    (<https://www.ebi.ac.uk/ena/data/view/PRJEB25004>).

163           In addition, a GWAS was performed by Moreira *et al.* (unpublished data) in the  
164    same meat-type chicken population (TT), in which some QTLs associated with BTW,  
165    BT%, THW, TH%, DRW, DR%, ABFW and ABF% traits were identified using high-  
166    density SNP chip (600K) data.

167 For SNPs selection, we overlapped all predicted deleterious SNPs identified in  
168 parental animals with the genomic windows identified in GWAS analysis that explained  
169 greater than 0.53 percent of the additive genetic variance associated with the studied  
170 traits (Supplemental Material, Table S1). Afterwards, the overlapped SNPs were  
171 analyzed with Tagger tool in Haploview software (Barrett *et al.* 2005) based on the  
172 linkage disequilibrium. In existence of adjacent SNPs with  $r^2 > 0.3$ , just one SNP  
173 remained to avoid the selection of markers in linkage disequilibrium and consequently,  
174 markers accounting for the same effect.

175 We defined 150 bp around each predicted deleterious SNP as a target region,  
176 with the variant located in the middle of the region. These regions were selected for  
177 target sequencing, and the amplicons designed were performed using DesignStudio  
178 online platform (Illumina Technology).

179

## 180 **Target sequencing**

181 Genomic DNA was extracted using PureLink® Genomic DNA kit (Invitrogen,  
182 Carlsbad, CA, USA) and quantified using Qubit® 2.0 Fluorometer (Thermo Fisher  
183 Scientific, Waltham, MA, USA). DNA integrity was evaluated in 1% agarose gel.  
184 Library preparation was performed according to Truseq® Custom Amplicon Low Input  
185 Kit Reference Guide (Illumina Technology). Libraries were quantified with quantitative  
186 real time PCR, using KAPA® Library Quantification kit (KAPA Biosystem) and size  
187 estimated using either Bioanalyzer® (Agilent Technologies) or Fragment Analyzer  
188 (Advanced Analytical Technologies). Paired-end sequencing with a read length of 150  
189 bp was performed on a MiniSeq™ (Illumina Technology).

190

## 191 **Sequencing data analyses, variant calling and functional annotation**

192 The SNP calling was conducted for the 282 chickens (offspring and parental  
193 generations). Raw sequencing data were aligned against the chicken reference genome  
194 *Gallus\_gallus5.0* (NCBI) with BWA v.0.7.15 program, using BWA-MEM algorithm.  
195 For the SNP calling, we used SAMtools v.1.3.1 program (Li *et al.* 2009), with *mpileup*  
196 option (Li 2011), and mapping and base qualities (Phred)  $\geq 20$ . The variant calling was  
197 performed with all 282 animals together. After the initial variant identification, the  
198 following filtering options were applied: INDEL removal, minor allele frequency  
199 (MAF)  $\geq 0.05$ , SNP call rate  $\geq 0.7$ , biallelic locus, sequencing depth  $\geq 15$  and Phred  
200 score quality  $\geq 40$ .

201 After variant calling and filtration, the remainig SNPs were annotated using VEP  
202 tool version 91 (McLaren *et al.* 2016) available on Ensemble v. 91 website (Zerbino *et*  
203 *al.* 2018), and the SIFT score was predicted.

204

### 205 **Linkage disequilibrium analysis**

206 Linkage disequilibrium analysis was conducted to indentify SNPs in strong  
207 linkage and avoid testing SNPs that capture the same effects. Predicted deleterious  
208 SNPs were visualized in Haploview program (Barrett *et al.* 2005) and adjacent SNPs  
209 with  $r^2 > 0.8$  were considered having a strong LD, and consequently one of them was  
210 excluded from association analyses. Haploview was also used to determine if the SNPs  
211 were in Hardy-Weinberg equilibrium (HWE).

212

### 213 **Association analysis**

214 For association analysis, Proc Mixed Procedure was used on SAS 9.4 Studio  
215 online platform (Statistical Analysis System Institute Inc., Cary, NC). Association  
216 analysis was performed with all 20 predicted deleterious SNPs together for each carcass



217 trait, and because of that correction for multiple tests was not necessary. The model  
218 used was:

$$219 \quad y = X\beta + Wa + Zu + e$$

220       Where  $y$  is the vector of observations for the measured phenotype;  $X$  is the  
221 incidence matrix relating the fixed effects to  $y$ ;  $\beta$  is the vector of fixed effects, which  
222 included sex and incubation;  $W$  is the genotype matrix (coded as 0, 1 and 2; 0 and 2 for  
223 homozygous and 1 for heterozygous) for all 20 deleterious SNPs and  $a$  is the vector of  
224 SNPs fixed effects.  $Z$  is the incidence matrix relating  $u$  to  $y$ ;  $u$  is the vector of the family  
225 random effect; and  $e$  is the vector of residual effects. For the weight traits, BW42 was  
226 used as a covariate. Association was considered significant at p-value < 0.05 for the F  
227 test.

228       Orthogonal contrasts were used to compare the mean performance of one  
229 homozygote against another and to estimate additive and allelic substitution effects.  
230 Similarly, dominance effect was estimated through the orthogonal contrast of the mean  
231 performance of the heterozygote against the mean performance of both homozygotes.  
232 These analyses were performed under the same linear model detailed above with Proc  
233 Mixed Procedure on SAS 9.4 Studio online platform, considering the SNPs that  
234 presented the three genotypes (0, 1 and 2). Estimates and contrasts were set based on the  
235 methodology defined by Falconer and Mackay (1996). Effects were considered  
236 significant for p-value < 0.05 in the F test.

237

### 238 **Data availability**

239 Data and reagents are available upon request. Table S1 contain the characterization of  
240 genomic windows identified in genome wide association analysis.

241

242

## RESULTS

## 243 **Phenotype measures**

244 The summary statistics for BW42, THW, TH%, ABFW, ABF%, DRW, DR%,  
245 BTW and BT% are given in Table 1.

246  
247 Table 1. Number of animals (N), mean, standard deviation (SD), minimum and maximum values for body  
248 weight at 42 days of age (BW42), thigh weight (THW), thigh yield (TH%), abdominal fat weight  
249 (ABFW), abdominal fat yield (ABF%), drumstick weight (DRW), drumstick yield (DR%), breast weight  
250 (BTW) and breast yield (BT%).

| <b>Phenotype</b> | <b>N</b> | <b>Mean</b> | <b>SD</b> | <b>Minimum</b> | <b>Maximum</b> |
|------------------|----------|-------------|-----------|----------------|----------------|
| <b>BW42 (g)</b>  | 237      | 2219.75     | 254.87    | 1310.00        | 2816.00        |
| <b>THW (g)</b>   | 237      | 203.75      | 30.27     | 110.80         | 277.80         |
| <b>TH%</b>       | 237      | 9.16        | 0.63      | 7.26           | 11.64          |
| <b>ABFW (g)</b>  | 237      | 50.93       | 14.63     | 19.00          | 91.00          |
| <b>ABF%</b>      | 237      | 2.29        | 0.61      | 1.01           | 4.25           |
| <b>DRW (g)</b>   | 237      | 30.01       | 44.63     | 161.60         | 419.20         |
| <b>DR%</b>       | 237      | 13.80       | 0.89      | 11.81          | 16.35          |
| <b>BTW (g)</b>   | 237      | 495.39      | 61.93     | 260.00         | 660.00         |
| <b>BT%</b>       | 237      | 22.32       | 1.31      | 18.28          | 26.51          |

251

## 252 **SNP selection and amplicon design**

253 The whole genome re-sequencing from 14 parental chickens of the studied meat-  
254 type population identified approximately 11 million SNPs across the genome, and after  
255 functional annotation 4,708 of them were predicted as deleterious SNPs. As the result of  
256 the overlap between these 4,708 SNPs and the six selected genomic windows identified  
257 in GWAS, 89 predicted deleterious SNPs were kept for the further analysis. After  
258 linkage disequilibrium analysis ( $r^2 > 0.3$ ), 20 uncorrelated SNPs remained for the  
259 amplicon design using DesignStudio online platform. The final amplicon panel had  
260 99% of coverage.

261

## 262 **Sequencing and variant calling**

263 Libraries sequencing from MiniSeq produced an average number of raw reads of  
264 298,791 per sample. The average of overall mapping rate of the raw reads against the  
265 *Gallus\_gallus5.0* (NCBI) genome assembly was 99.74%. After variant calling, 1,957  
266 variants (including SNPs and INDELS) were initially detected, and 195 SNPs remained  
267 after filtration. The average depth of the remaining SNPs was 7,961 reads.

268 Functional annotation was performed for the 195 SNPs. As shown in Table 2, 29  
269 SNPs were annotated as novel variants. From the 195 SNPs, 26% were in intronic  
270 regions, 20% were classified as missense and 14% were synonymous variants.

271 As already mentioned, missense SNPs can be predicted as deleterious or  
272 tolerated based on its SIFT score (Ng and Henikoff 2003). In our study, from the 56  
273 missense SNPs identified, 26 were classified as tolerated, 21 as deleterious, and 9 had  
274 no prediction (Table 2).

275

276 Table 2. Number of novel and existing variants, and classification of functional annotation of single  
277 nucleotide polymorphisms (SNPs) performed with Variant Effect Predictor (VEP) online platform.

| <b>Variant</b>  | <b>Number of SNPs</b> |     |
|-----------------|-----------------------|-----|
| <b>Novel</b>    |                       | 29  |
| <b>Existing</b> |                       | 166 |

  

| <b>Variant</b>    | <b>SIFT Prediction</b> | <b>Number of SNPs</b> |
|-------------------|------------------------|-----------------------|
|                   | Deleterious            | 21                    |
| <b>Missense</b>   | Tolerated              | 26                    |
|                   | No prediction          | 9                     |
| <b>Intron</b>     |                        | 70                    |
| <b>Intergenic</b> |                        | 25                    |

|                        |    |
|------------------------|----|
| <b>Synonymous</b>      | 45 |
| <b>5' URT</b>          | 1  |
| <b>Downstream gene</b> | 32 |
| <b>Upstream gene</b>   | 35 |
| <b>Splice</b>          | 6  |

278

279

## 280 Linkage disequilibrium verification

281 As presented in Figure 1, only one region of adjacent SNPs had  $r^2 > 0.3$  ( $r^2 =$   
 282 1.0, black square – chr26:3747344 and chr26: 3747346). Thus, chr26:3747344 was  
 283 excluded, leaving 20 predicted deleterious SNPs for further analysis.

284

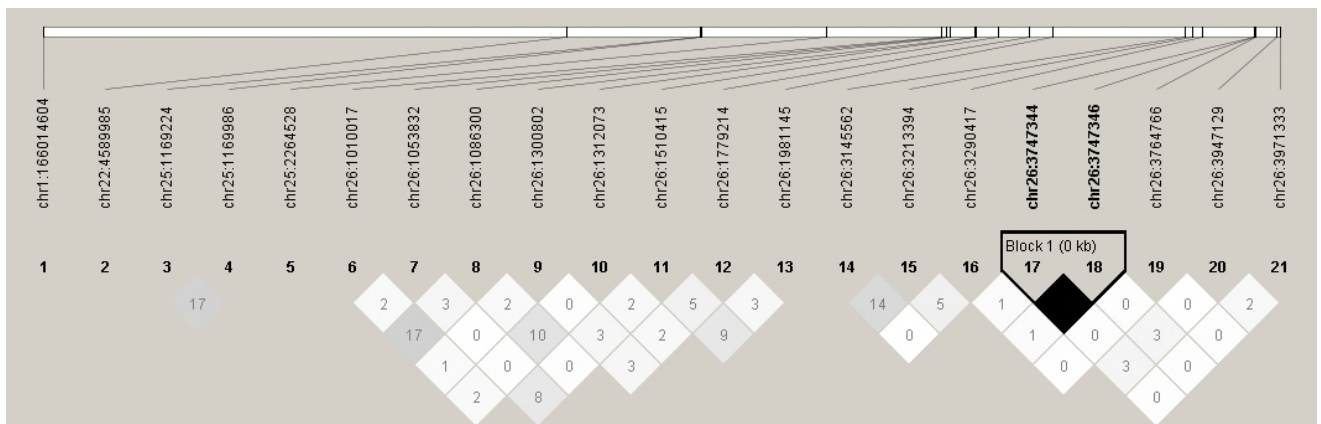

285

286 Figure 1. Linkage disequilibrium plot of the 21 predicted deleterious SNPs after filtering steps. The  $r^2$   
 287 value is presented within each square. The gradient color also represents  $r^2$  values, white is 0 and black is  
 288 1.

289

290 Detailed information of the 20 predicted deleterious SNPs (genome position,  
 291 SNP ID, located gene, alleles and genotypes frequencies, HWE test and SIFT score) is  
 292 presented in Table 3. Two SNPs did not have *rs* ID, and four genes were considered as  
 293 novel genes, therefore, the ensemble gene ID was also presented. Seven SNPs did not  
 294 have any animal genotyped with the alternative homozygous, and five SNPs were  
 295 significant for HWE test.

296 Table 3. Deleterious SNPs selected for the association analyses with carcass traits.

| GGA       | Position    | SNP ID      | Gene<br>Symbol | Ensembl Gene ID    | R/A | Allele    |       | Genotype Frequency |     |       |     |       |    | HW p-value | SIFT |
|-----------|-------------|-------------|----------------|--------------------|-----|-----------|-------|--------------------|-----|-------|-----|-------|----|------------|------|
|           |             |             |                |                    |     | Frequency |       | HREF               |     | HT    |     | HALT  |    |            |      |
|           |             |             |                |                    |     | R         | A     | Freq               | N   | Freq  | N   | Freq  | N  |            |      |
| <b>1</b>  | 166,014,604 | rs739508259 | VWA8           | ENSGALG00000016955 | G/C | 0.588     | 0.412 | 0.364              | 86  | 0.449 | 106 | 0.186 | 44 | 0.6262     | 0.01 |
| <b>22</b> | 4,589,985   | rs314536739 | ANXA4          | ENSGALG00000038783 | C/T | 0.738     | 0.262 | 0.531              | 126 | 0.413 | 98  | 0.054 | 13 | 0.4782     | 0.02 |
| <b>25</b> | 1,169,224   | rs312547749 | Novel Gene     | ENSGALG00000027316 | C/T | 0.435     | 0.565 | 0.181              | 43  | 0.506 | 120 | 0.312 | 74 | 0.2798     | 0.00 |
| <b>25</b> | 1,169,986   | rs737797683 | CRNN           | ENSGALG00000027316 | G/C | 0.808     | 0.192 | 0.666              | 158 | 0.282 | 67  | 0.050 | 12 | 0.2771     | 0.00 |
| <b>25</b> | 2,264,528   | rs739048621 | Novel Gene     | ENSGALG00000014643 | G/A | 0.947     | 0.052 | 0.894              | 212 | 0.105 | 25  | 0.000 | 0  | 0.7875     | 0.00 |
| <b>26</b> | 1,010,017   | c.482C>T    | MYBPH          | ENSGALG00000000164 | C/T | 0.764     | 0.236 | 0.616              | 146 | 0.295 | 70  | 0.088 | 21 | 0.0071*    | 0.04 |
| <b>26</b> | 1,053,832   | c.383C>T    | CEPT1          | ENSGALG00000000142 | C/T | 0.941     | 0.059 | 0.881              | 209 | 0.118 | 28  | 0.000 | 0  | 0.7402     | 0.02 |
| <b>26</b> | 1,086,300   | rs312325687 | Novel Gene     | ENSGALG00000000104 | A/G | 0.639     | 0.361 | 0.443              | 105 | 0.392 | 93  | 0.164 | 39 | 0.0124     | 0.01 |
| <b>26</b> | 1,300,802   | rs314560661 | AHCYLI         | ENSGALG00000000329 | T/C | 0.941     | 0.059 | 0.881              | 209 | 0.118 | 28  | 0.000 | 0  | 0.7875     | 0.01 |
| <b>26</b> | 1,312,073   | rs14297872  | STRIP1         | ENSGALG00000037995 | C/T | 0.932     | 0.068 | 0.865              | 205 | 0.135 | 32  | 0.000 | 0  | 0.6067     | 0.01 |
| <b>26</b> | 1,510,415   | rs741234441 | Novel Gene     | ENSGALG00000000477 | C/T | 0.605     | 0.395 | 0.320              | 76  | 0.569 | 135 | 0.109 | 26 | 2.101E-6*  | 0.01 |
| <b>26</b> | 1,779,214   | rs733369312 | PPP1R15B       | ENSGALG00000000611 | C/A | 0.624     | 0.376 | 0.299              | 71  | 0.649 | 154 | 0.050 | 12 | 5.457E-13* | 0.00 |
| <b>26</b> | 1,981,145   | rs731705610 | CNTN2          | ENSGALG00000000653 | C/T | 0.947     | 0.053 | 0.894              | 212 | 0.105 | 25  | 0.000 | 0  | 0.9367     | 0.02 |
| <b>26</b> | 3,145,562   | rs738655377 | Novel Gene     | ENSGALG00000028858 | A/G | 0.863     | 0.137 | 0.725              | 172 | 0.274 | 65  | 0.000 | 0  | 1.0E-4*    | 0.00 |
| <b>26</b> | 3,213,394   | rs736010549 | WDR77          | ENSGALG00000040864 | A/T | 0.810     | 0.190 | 0.628              | 149 | 0.362 | 86  | 0.008 | 2  | 0.1768     | 0.01 |

|           |           |             |               |                     |     |       |       |       |     |       |     |       |     |           |      |
|-----------|-----------|-------------|---------------|---------------------|-----|-------|-------|-------|-----|-------|-----|-------|-----|-----------|------|
| <b>26</b> | 3,290,417 | rs737237434 | <i>DDX20</i>  | ENSGALG00000001504  | A/G | 0.780 | 0.220 | 0.605 | 143 | 0.347 | 82  | 0.046 | 11  | 0.8671    | 0.01 |
| <b>26</b> | 3,747,346 | rs14300225  | <i>PTPN22</i> | ENSGALG000000021656 | C/T | 0.084 | 0.916 | 0.004 | 1   | 0.160 | 38  | 0.835 | 198 | 0.7153    | 0.00 |
| <b>26</b> | 3,764,766 | rs739340698 | <i>AP4B1</i>  | ENSGALG000000035295 | C/T | 0.935 | 0.065 | 0.873 | 207 | 0.122 | 29  | 0.004 | 1   | 1.0       | 0.02 |
| <b>26</b> | 3,947,129 | rs313532967 | <i>BARL</i>   | ENSGALG00000002170  | A/G | 0.736 | 0.264 | 0.493 | 117 | 0.485 | 115 | 0.021 | 5   | 5.410E-5* | 0.00 |
| <b>26</b> | 3,971,333 | rs741234600 | <i>SYCP1</i>  | ENSGALG00000002511  | A/C | 0.950 | 0.050 | 0.881 | 209 | 0.118 | 28  | 0.000 | 0   | 0.5256    | 0.03 |

297 GGA, *Gallus gallus* chromosome; R, reference allele; and A, alternative allele; HREF, homozygous of reference allele; HT, heterozygous; HALT, homozygous of alternative  
298 allele; HW, Hardy-Weinberg. SIFT, score predicted in functional annotation; \*Significant p-value <0.05.



### 300 **Association analysis, additive and dominance effects**

301           Of the 20 predicted deleterious SNPs studied, six were significantly associated (p-  
302 value<0.05) with at least one carcass trait. Three SNPs (rs737797683, rs313532967 and  
303 rs741234600) were associated with breast traits; another three (rs739508259, rs312325687  
304 and rs741234600) were associated with thigh traits; and one SNP (rs736010549) was  
305 associated with drumstick weight. No SNP was associated with abdominal fat traits. Detailed  
306 results for all association tests (p-values) are presented in Table 4.



307 Table 4. SNPs association analyses results for carcass traits.

308

| <b>SNP ID</b>      | <b>N<sup>a</sup></b> | <b>BW42</b> | <b>BTW</b> | <b>BT%</b> | <b>THW</b> | <b>TH%</b> | <b>DRW</b> | <b>DR%</b> | <b>ABFW</b> | <b>ABF%</b> |
|--------------------|----------------------|-------------|------------|------------|------------|------------|------------|------------|-------------|-------------|
| <b>rs739508259</b> | 234                  | 0.2221      | 0.8332     | 0.8003     | 0.0098*    | 0.0146*    | 0.7289     | 0.6781     | 0.2133      | 0.1428      |
| <b>rs314536739</b> | 234                  | 0.2297      | 0.2395     | 0.1313     | 0.1342     | 0.1393     | 0.4548     | 0.3859     | 0.1078      | 0.5586      |
| <b>rs312547749</b> | 234                  | 0.3428      | 0.1884     | 0.2211     | 0.8707     | 0.7415     | 0.3945     | 0.3945     | 0.5279      | 0.5510      |
| <b>rs737797683</b> | 234                  | 0.1798      | 0.0532     | 0.0346*    | 0.0573     | 0.0487*    | 0.1075     | 0.0959     | 0.7872      | 0.7077      |
| <b>rs739048621</b> | 234                  | 0.6947      | 0.5004     | 0.5365     | 0.5458     | 0.5398     | 0.5261     | 0.5375     | 0.3414      | 0.4976      |
| <b>c.482C&gt;T</b> | 234                  | 0.6547      | 0.2735     | 0.3831     | 0.7965     | 0.6477     | 0.7273     | 0.8108     | 0.9809      | 0.8872      |
| <b>c.383C&gt;T</b> | 234                  | 0.0042*     | 0.8124     | 0.4050     | 0.3775     | 0.1619     | 0.3114     | 0.2233     | 0.9014      | 0.2758      |
| <b>rs312325687</b> | 234                  | 0.1343      | 0.1050     | 0.1199     | 0.0354*    | 0.0220*    | 0.9174     | 0.9382     | 0.9506      | 0.9583      |
| <b>rs314560661</b> | 234                  | 0.8758      | 0.2043     | 0.3390     | 0.3678     | 0.4045     | 0.4196     | 0.3606     | 0.5637      | 0.9232      |
| <b>rs14297872</b>  | 234                  | 0.0304*     | 0.5964     | 0.8217     | 0.2631     | 0.1209     | 0.4663     | 0.4815     | 0.8762      | 0.5523      |
| <b>rs741234441</b> | 234                  | 0.2136      | 0.4656     | 0.4490     | 0.2668     | 0.2490     | 0.6970     | 0.7647     | 0.6032      | 0.9682      |
| <b>rs733369312</b> | 234                  | 0.6968      | 0.9697     | 0.9677     | 0.1303     | 0.2975     | 0.1121     | 0.0505     | 0.6662      | 0.5475      |
| <b>rs731705610</b> | 234                  | 0.1467      | 0.2037     | 0.1149     | 0.2577     | 0.1953     | 0.1164     | 0.1230     | 0.0669      | 0.1613      |
| <b>rs738655377</b> | 234                  | 0.8992      | 0.1334     | 0.1881     | 0.1141     | 0.1789     | 0.8429     | 0.9745     | 0.4098      | 0.5450      |
| <b>rs736010549</b> | 234                  | 0.9026      | 0.0677     | 0.1090     | 0.5474     | 0.6187     | 0.0038*    | 0.0052*    | 0.1523      | 0.3421      |
| <b>rs737237434</b> | 234                  | 0.6837      | 0.1330     | 0.1863     | 0.0611     | 0.0885     | 0.5636     | 0.5137     | 0.8907      | 0.8882      |

|                    |     |        |         |         |         |         |        |        |        |        |
|--------------------|-----|--------|---------|---------|---------|---------|--------|--------|--------|--------|
| <b>rs14300224</b>  | 234 | 0.8352 | 0.5980  | 0.4824  | 0.8976  | 0.9416  | 0.7702 | 0.6967 | 0.0934 | 0.1217 |
| <b>rs739340698</b> | 234 | 0.1450 | 0.2839  | 0.2143  | 0.4592  | 0.4109  | 0.4663 | 0.5506 | 0.7801 | 0.8390 |
| <b>rs313532967</b> | 234 | 0.6840 | 0.0144* | 0.0234* | 0.9630  | 0.9307  | 0.6828 | 0.5735 | 0.1644 | 0.1666 |
| <b>rs741234600</b> | 234 | 0.5306 | 0.0229* | 0.0208* | 0.0086* | 0.0093* | 0.2248 | 0.3559 | 0.3680 | 0.371  |

309 <sup>a</sup>Sample sizes. \*Significant at  $p < 0.05$ . BW42: body weight at 42 days; BTW: breast weight; BT%: breast yield; THW: thigh weight; TH% thigh yield; DRW: drumstick

310 weight; DR%: drumstick yield; ABFW: abdominal fat weight; ABF%: abdominal fat yield.

311

312 Additive and dominance effects were estimated only for associated SNPs that  
313 presented the three genotypes, consequently rs741234600 was not considered in these  
314 analyses. We deemed significant effects with p-value <0.05. Allele substitution effect test was  
315 performed only for significant additive effects (Table 5). Additive and allele substitution  
316 effects for rs739508259 and rs312325687 associated with THW and TH% were significant.  
317 Additive and dominance effects for rs736010549 associated with DRW and DR% were  
318 significant, but not for allele substitution test.

319 Table 5. P-values, estimates and standard error for additive, dominance and allele substitution effects for SNPs with respective associated traits in broilers.

| SNP ID             | Association |          | Additive Effect |                   | Dominance Effect |                   | Allele Substitution Effect |                   |
|--------------------|-------------|----------|-----------------|-------------------|------------------|-------------------|----------------------------|-------------------|
|                    | Trait       | p-value  | P               | E (se)            | P                | E (se)            | P                          | E (se)            |
| <b>rs739508259</b> | THW         | 0.0098** | 0.0029*         | -5.7594 (1.9068)  | 0.7616           | -0.7945 (2.6155)  | 0.0062*                    | 5.1219 (1.8496)   |
|                    | TH%         | 0.0146*  | 0.0042*         | -0.2479 (0.08523) | 0.6723           | -0.04971 (0.1174) | 0.0064*                    | 0.2268 (0.08213)  |
| <b>rs737797683</b> | BT%         | 0.0346*  | 0.0104*         | -0.4857 (0.1880)  | 0.2308           | -0.2553 (0.2124)  | 0.0506                     | 0.3041 (0.1547)   |
|                    | TH%         | 0.0487*  | 0.1966          | -0.1902 (0.1469)  | 0.0144*          | -0.4123 (0.1673)  | -                          | -                 |
| <b>rs312325687</b> | THW         | 0.0354*  | 0.0124*         | 6.6692 (2.6307)   | 0.9484           | -0.1913 (2.9505)  | 0.0126*                    | -6.5551 (2.5853)  |
|                    | TH%         | 0.0220*  | 0.0069*         | 0.3185 (0.1160)   | 0.9387           | 0.01018 (0.1323)  | 0.0063*                    | -0.3148 (0.1130)  |
| <b>rs736010549</b> | DRW         | 0.0038*  | 0.0009*         | -13.8438 (4.1322) | 0.0016*          | -13.8035 (4.3241) | 0.2394                     | 2.3175 (1.9641)   |
|                    | DR%         | 0.0052*  | 0.0016*         | -0.5862 (0.1836)  | 0.0017*          | -0.6107 (0.1919)  | 0.3520                     | 0.08240 (0.08834) |
| <b>rs313532967</b> | BTW         | 0.0144*  | 0.6572          | -2.4332 (5.4758)  | 0.2326           | 6.9216 (5.7825)   | -                          | -                 |
|                    | BT%         | 0.0234*  | 0.6708          | -0.1085 (0.2550)  | 0.2634           | 0.3015 (0.2689)   | -                          | -                 |
| <b>rs741234600</b> | BTW         | 0.0229*  | -               | -                 | -                | -                 | 0.0602                     | 9.4399 (4.9996)   |
|                    | BT%         | 0.0208*  | -               | -                 | -                | -                 | 0.0491*                    | 0.4620 (0.2335)   |
|                    | THW         | 0.0086*  | -               | -                 | -                | -                 | 0.0136*                    | 10.0902 (4.0577)  |
|                    | TH%         | 0.0093*  | -               | -                 | -                | -                 | 0.0121*                    | 0.4598 (0.1819)   |

320 THW: thigh weight; TH% thigh yield; DRW: drumstick weight; DR%: drumstick yield; BTW: breast weight; BT%: breast yield. P, E and Se are p-values, estimates and

321 standard errors for the respective analysis. \*Significant at p &lt; 0.05.

322

## DISCUSSION

323

324

325

326

327

The identification of genetic markers associated with carcass weight and yield traits has been the focus of several studies due to the economic importance of these traits in broiler production. With the main goal of finding putative causal mutations for carcass traits, this study selected predicted deleterious SNPs present in QTLs regions to be evaluated as potential causal mutations in our TT Reference Population.

328

329

330

331

332

333

334

335

336

337

338

339

340

341

342

The SNP rs739508259 is located in the von willebrand factor A domain containing 8 (VWA8) gene and within the GGA-1 at 166 Mb genomic window identified in the GWAS analysis. This region was associated with DRW and DR%, explaining 3.20 and 2.79 of the additive genetic variance, respectively. This SNP is a G>C nucleotide change with minor allele (C) frequency of 0.42. The nucleotide change causes the amino acid substitution of glutamine to histidine. The rs739508259 was associated with THW and TH% and had significant additive and allele substitution effects for both traits. On average, for each C allele in the animal's genotype, an increase of 5.12g was observed for THW and 0.24% for TH%, compared to the GG genotype. The window on GGA-1 at 166 Mb also explained 0.20% and 0.14% of the additive genetic variance for THW and TH%, respectively. However, these proportions were not enough to be considered significant (Additional File 1). Furthermore, it is interesting to observe that SNP rs739508259 was not significantly associated with DRW and DR% and this may be because we used a subset of 237 animals from the 1,408 animals used in GWAS analysis or because the low number of animals used (237) in the association analysis. Similar findings were also noted for other associated SNPs.

343

344

345

In mice VWA8 gene is highly expressed in skeletal muscle, has ATPase domains, mitochondrial targeting sequences and is a mitochondrial protein (Luo *et al.* 2017). More studies are necessary to relate this gene with muscle growth in chickens.

346           The predicted deleterious SNP rs736010549 is located in the WD repeat domain 77  
347 (*WDR77*) gene. Furthermore, it is located within the GGA-26 at 3 Mb genomic window  
348 identified in GWAS analysis, and this region was associated with breast weight (BRW) and  
349 breast yield (BR%), representing 0.53 and 0.86 of the additive genetic variance, respectively  
350 (Additional File 1). This polymorphism results in an amino acid change from serine to  
351 cysteine (A/T allele substitution), with the minor allele (T) frequency of 0.19. This SNP was  
352 associated with drumstick weight (DRW) and drumstick yield (DR%). It was also significant  
353 for additive and dominance effects tests for both traits. On average, animals with TT genotype  
354 had 13.8g more of DRW and 0.58 % more of DR% than AA animals. This SNP presented  
355 complete dominance for both traits.

356           The WD repeat domain 77 (*WDR77*) gene belongs to the WD repeat proteins that is  
357 characterized by multiple protein interaction capacity (Friesen *et al.* 2001). The protein p44  
358 (also named as methylosome protein 50, MEP50) coded by *WDR77* and is an androgen  
359 receptor (AR) coactivator by multiprotein complex formation (Hosohata *et al.* 2003). In  
360 humans, p44 was associated with inhibition of prostate cancer cell growth as coactivator of  
361 AR (Zhou *et al.* 2006; Gu *et al.* 2011b) and with breast cancer growth mediated through  
362 estrogen and its receptor (Peng *et al.* 2010).

363           Several studies showed the inhibitory action of androgenic steroids in chicken growth  
364 (Fennell *et al.* 1990; Fennell and Scanes 1992; Esquivel-Hernandez *et al.* 2016), which is a  
365 possible consequence of the androgen receptor or estrogen receptor aromatization (Fennel *et*  
366 *al.* 1996; Callewaert *et al.* 2010). Kong *et al.* (2017) studied different expressed (DE) genes in  
367 a selected and unselected broiler breeds, and among their results, they suggested that inhibited  
368 AR was predicted to be an effective regulatory factor for DE genes in selected breed,  
369 corroborating previously cited studies. Our results suggest that SNP rs736010549 alter the  
370 conformation of p44, decreasing the AR activation and so contributing to growth in chickens.

371           The predicted deleterious rs313532967 is located in the bile acid receptor-like (*BARL*)  
372 gene and within the GGA-26 at 3 Mb genomic window identified in GWAS analysis. This  
373 region was associated with BTW and BT%, representing 0.53 and 0.86 of the additive genetic  
374 variance respectively. This SNP is an A>G change, resulting in the amino acid change of  
375 asparagine to serine, and the minor allele (G) frequency is 0.264. The HWE test was  
376 significant, and this may be due to our finite population, or indicating that this locus may be  
377 under selection or inbreeding. This SNP was associated with BTW and BT% and did not have  
378 additive or dominant effects. Only five animals had GG genotype and this could help explain  
379 the lack of additive and dominant effects.

380           The *BARL* gene have a DNA-binding domain of Farnesoid X receptor (FXR) family.  
381 This domain in humans was intensively studied and when it is activated by bile acids it can  
382 regulate bile acids synthesis, conjugation and transport, consequently impacting in lipid and  
383 glucose metabolism (Claudel *et al.* 2005; Preidis *et al.* 2017). When bile acids are released in  
384 the ileum, its induces the synthesis of fibroblast growth factor (FGF-19) which stimulates  
385 hepatic protein and glycogen synthesis (Kir *et al.* 2011). In an interesting work in broilers, Lai  
386 *et al.* (2018) demonstrated that dietary supplementation of swine bile acids for broiler  
387 chickens influences their growth performance and carcass characteristics as reduction of  
388 abdominal fat, increase of carcass weight, eviscerated weight and leg weight. Therefore, our  
389 study indicates that *BARL* gene can be involved in growth and carcass development in  
390 chicken.

391           The SNP rs741234600 is located in synaptonemal complex protein 1 (*SYCP1*) gene  
392 and within the GGA-26 at 3 Mb genomic window identified in GWAS analysis. This region  
393 was associated with BTW and BT%, representing 0.53 and 0.86 of the additive genetic  
394 variance respectively. In our study, this SNP was associated with BTW, BT%, THW and  
395 TH%, and is an A>C nucleotide change, resulting in the amino acid substitution of lysine to

396 threonine, and the minor allele (C) frequency is 0.05. As the CC genotype (alternative  
397 homozygous) was not present in the evaluated animals, only allele substitution effect was  
398 performed. For each allele A, the animals had 0.46% more BT%, 10.09 g more THW and  
399 0.45% more TH%.

400 The SNP rs737797683 is located in the cornulin (*CRNN*) gene, within the GGA-25 at  
401 1 Mb genomic window identified in GWAS analysis. This region was associated with BT%,  
402 BR% and ABF% representing 0.24, 0.24 and 0.23 of the additive genetic variance  
403 respectively. This SNP was associated with BT% and TH%. This SNP is an G>C change,  
404 resulting in the amino acid change of aspartic acid to histidine, and the minor allele (C)  
405 frequency is 0.19. This polymorphism was significant for additive effect for BT% trait,  
406 significant for dominance effect for TH%.

407 The SNP rs312325687 is located in the cryptochrome 4 (*CRY4*) gene and within the  
408 GGA-26 at 1 Mb genomic window identified in GWAS analysis, previously associated with  
409 ABFW and ABF%, representing 1.06 and 0.54 of the additive genetic variance respectively.  
410 This SNP was associated with THW and TH% and is an A>G change, resulting in the amino  
411 acid change of aspartic acid to glycine, being the minor allele (G) frequency equal to 0.36.  
412 This polymorphism had significant additive and allele substitution effects for both traits.

413 *SYCP1*, *CRNN*, *CRY4* were not selected as candidate genes for muscle growth or  
414 carcass development in this study because there is no information available in the literature to  
415 support this. More studies with these genes are necessary to understand their relationship with  
416 carcass and muscle growth.

417 It is pertinent to note that although rs738655377 was not significantly associated with  
418 any of the phenotypes tested, none of the animal were homozygous for the alternative allele,  
419 and the HWE test was significant. This observation provides evidence for a lethal



420 polymorphism when in homozygosity. This variant is within a novel gene  
421 (ENSGALG00000028858) that has gene ontology terms related to oxidoreductase activity.

422 In conclusion, our study identified 20 predicted deleterious SNPs in different QTLs  
423 associated with carcass traits and succeeded in associating six of them with phenotypes  
424 related to muscle growth. Three predicted deleterious SNPs associated were located in genes  
425 that we consider candidate genes for carcass and muscle weight, and development. The main  
426 limitation of our study is that it is difficult to determine if the identified mutations are the  
427 causative mutation or are in linkage disequilibrium with the real causal mutation.

428

#### 429 ACKNOWLEDGMENTS

430 The authors are grateful for the support from São Paulo Research Foundation (FAPESP)  
431 thematic grant 14/08704-0 and Brazilian Agricultural Research Corporation – Embrapa  
432 (project number 01.11.07.002.04.02). The TT Reference Population was subsidized by the  
433 National Council of Scientific and Technological Development (CNPq) grant number  
434 481755/2007-1 from the Brazilian Government. C. Boschiero received a fellowship from the  
435 program Science Without Borders - CNPq, grant 370620/2013-5. P.A. Trevisoli received  
436 fellowship from FAPESP grant 2016/13589-0. L.L. Coutinho is recipient of productivity  
437 fellowship from CNPq. The authors would like to acknowledge the collaborative efforts  
438 among EMBRAPA Suínos e Aves and University of São Paulo.

439

#### 440 LITERATURE CITED

441 Abplanalp, H., 1992 Inbred lines as genetic resources of chickens. *Poult. Sci. Rev.* 4: 29–39.  
442 Barrett, J. C., B. Fry, J. Maller, and M. J. Daly, 2005 Haploview: analysis and visualization of  
443 LD and haplotype maps. *Bioinformatics* 21: 263–265.  
444 Boschiero, C., G. C. M. Moreira, A. A. Gheyas, T. F. Godoy, G. Gasparin *et al.*, 2018

- 445 Genome-wide characterization of genetic variants and putative regions under selection in  
446 meat and egg-type chicken lines. *BMC Genomics* 19: 83.
- 447 Callewaert, F., M. Sinnesael, E. Gielen, S. Boonen, and D. Vanderschueren, 2010 Skeletal  
448 sexual dimorphism: relative contribution of sex steroids, GH-IGF1, and mechanical  
449 loading. *J. Endocrinol.* 207: 127–134.
- 450 Cassoli, C. S. da S., 2007 Identificação e análise de etiquetas de seqüências expressas (ESTs)  
451 na hipófise e hipotálamo de *Gallus gallus*. Tese - Esc. Super. Agric. Luiz Queiroz.
- 452 Claudel, T., B. Staels, and F. Kuipers, 2005 The Farnesoid X receptor: a molecular link  
453 between bile acid and lipid and glucose metabolism. *Arterioscler. Thromb. Vasc. Biol.*  
454 25: 2020–30.
- 455 Cruz, V. A. R. da, F. S. Schenkel, R. P. Savegnago, N. V. Grupioni, N. B. Stafuzza *et al.*,  
456 2015 Association of Apolipoprotein B and Adiponectin Receptor 1 Genes with Carcass,  
457 Bone Integrity and Performance Traits in a Paternal Broiler Line (R. Davoli, Ed.). *PLoS*  
458 *One* 10: e0136824.
- 459 Dodgson, J. B., M. E. Delany, and H. H. Cheng, 2011 Poultry genome sequences: progress  
460 and outstanding challenges. *Cytogenet. Genome Res.* 134: 19–26.
- 461 Ellegren, H., 2005 The avian genome uncovered. *Trends Ecol. Evol.* 20: 180–186.
- 462 Esquivel-Hernandez, Y., R. E. Ahumada-Cota, M. Attene-Ramos, C. Z. Alvarado, P.  
463 Castañeda-Serrano *et al.*, 2016 Making things clear: Science-based reasons that chickens  
464 are not fed growth hormones. *Trends Food Sci. Technol.* 51: 106–110.
- 465 Falconer, D. S., and T. F. C. Mackay, 1996 *Introduction to Quantitative Genetics*. Pearson  
466 Education Limited.
- 467 Fennel, M. J., S. V. Radecki, J. A. Proudman, and C. G. Scanes, 1996 The Suppressive  
468 Effects of Testosterone on Growth in Young Chickens Appears to be Mediated via a  
469 Peripheral Androgen Receptor; Studies of the Anti-Androgen ICI 176,334. *Poult. Sci.*

- 470 75: 763–766.
- 471 Fennell, M. J., A. L. Johnson, and C. G. Scanes, 1990 Influence of androgens on plasma  
472 concentrations of growth hormone in growing castrated and intact chickens. *Gen. Comp.*  
473 *Endocrinol.* 77: 466–475.
- 474 Fennell, M. J., and C. G. Scanes, 1992 Inhibition of Growth in Chickens by Testosterone, 5 -  
475 Dihydrotestosterone, and 19-Nortestosterone. *Poult. Sci.* 71: 357–366.
- 476 Friesen, W. J., A. Wyce, S. Paushkin, L. Abel, J. Rappsilber *et al.*, 2001 A Novel WD Repeat  
477 Protein Component of the Methylosome Binds Sm Proteins\*.
- 478 Gu, X., C. Feng, L. Ma, C. Song, Y. Wang *et al.*, 2011a Genome-wide association study of  
479 body weight in chicken F2 resource population. *PLoS One* 6: e21872.
- 480 Gu, Z., L. Zhou, S. Gao, and Z. Wang, 2011b Nuclear transport signals control cellular  
481 localization and function of androgen receptor cofactor p44/WDR77. *PLoS One* 6:  
482 e22395.
- 483 Han, R., Y. Wei, X. Kang, H. Chen, G. Sun *et al.*, 2012 Novel SNPs in the PRDM16 gene  
484 and their associations with performance traits in chickens. *Mol. Biol. Rep.* 39: 3153–  
485 3160.
- 486 Hillier, L. W., W. Miller, E. Birney, W. Warren, R. C. Hardison *et al.*, 2004 Sequence and  
487 comparative analysis of the chicken genome provide unique perspectives on vertebrate  
488 evolution. *Nature* 432: 695–716.
- 489 Hosohata, K., P. Li, Y. Hosohata, J. Qin, R. G. Roeder *et al.*, 2003 Purification and  
490 Identification of a Novel Complex Which Is Involved in Androgen Receptor-Dependent  
491 Transcription. *Mol. Cell. Biol.* 23: 7019–7029.
- 492 Kir, S., S. A. Beddow, V. T. Samuel, P. Miller, S. F. Previs *et al.*, 2011 FGF19 as a  
493 Postprandial, Insulin-Independent Activator of Hepatic Protein and Glycogen Synthesis.  
494 *Science* (80-. ). 331: 1621–1624.

- 495 Kong, B.-W., N. Hudson, D. Seo, S. Lee, B. Khatri *et al.*, 2017 RNA sequencing for global  
496 gene expression associated with muscle growth in a single male modern broiler line  
497 compared to a foundational Barred Plymouth Rock chicken line. *BMC Genomics* 18:.
- 498 Kranis, A., A. A. Gheyas, C. Boschiero, F. Turner, L. Yu *et al.*, 2013 Development of a high  
499 density 600K SNP genotyping array for chicken. *BMC Genomics* 14: 59.
- 500 Lai, W., W. Huang, B. Dong, A. Cao, W. Zhang *et al.*, 2018 Effects of dietary supplemental  
501 bile acids on performance, carcass characteristics, serum lipid metabolites and intestinal  
502 enzyme activities of broiler chickens. *Poult. Sci.* 97: 196–202.
- 503 Li, H., 2011 A statistical framework for SNP calling, mutation discovery, association  
504 mapping and population genetical parameter estimation from sequencing data.  
505 *Bioinformatics* 27: 2987–2993.
- 506 Li, H., B. Handsaker, A. Wysoker, T. Fennell, J. Ruan *et al.*, 2009 The Sequence  
507 Alignment/Map format and SAMtools. *Bioinformatics* 25: 2078–2079.
- 508 Liu, R., Y. Sun, G. Zhao, F. Wang, D. Wu *et al.*, 2013 Genome-Wide Association Study  
509 Identifies Loci and Candidate Genes for Body Composition and Meat Quality Traits in  
510 Beijing-You Chickens (B. A. White, Ed.). *PLoS One* 8: e61172.
- 511 Luo, M., A. E. Mengos, W. Ma, J. Finlayson, R. Z. Bustos *et al.*, 2017 Characterization of the  
512 novel protein KIAA0564 (Von Willebrand Domain-containing Protein 8). *Biochem.*  
513 *Biophys. Res. Commun.* 487: 545–551.
- 514 Marchesi, J. A. P., M. E. Buzanskas, M. E. Cantão, A. M. G. Ibelli, J. O. Peixoto *et al.*, 2017  
515 Relationship of runs of homozygosity with adaptive and production traits in a paternal  
516 broiler line. *animal* 1–9.
- 517 McLaren, W., L. Gil, S. E. Hunt, H. S. Riat, G. R. S. Ritchie *et al.*, 2016 The Ensembl Variant  
518 Effect Predictor. *Genome Biol.* 17: 122.
- 519 Moreira, G. C. M., T. F. Godoy, C. Boschiero, A. Gheyas, G. Gasparin *et al.*, 2015 Variant

- 520 discovery in a QTL region on chromosome 3 associated with fatness in chickens. *Anim.*  
521 *Genet.* 46: 141–147.
- 522 Ng, P. C., and S. Henikoff, 2002 Accounting for human polymorphisms predicted to affect  
523 protein function. *Genome Res.* 12: 436–46.
- 524 Ng, P. C., and S. Henikoff, 2003 SIFT: Predicting amino acid changes that affect protein  
525 function. *Nucleic Acids Res.* 31: 3812–3814.
- 526 Peng, Y., Y. Li, L. L. Gellert, X. Zou, J. Wang *et al.*, 2010 Androgen receptor coactivator  
527 p44/Mep50 in breast cancer growth and invasion. *J. Cell. Mol. Med.* 14: 2780–9.
- 528 Preidis, G. A., K. H. Kim, and D. D. Moore, 2017 Nutrient-sensing nuclear receptors PPAR $\alpha$   
529 and FXR control liver energy balance. *J. Clin. Invest.* 127: 1193–1201.
- 530 Rosário, M. F. do, M. C. Ledur, A. S. A. M. T. Moura, L. L. Coutinho, and A. A. F. Garcia,  
531 2009 Genotypic characterization of microsatellite markers in broiler and layer selected  
532 chicken lines and their reciprocal F1s. *Sci. Agric.* 66: 150–158.
- 533 Roux, P.-F., M. Boutin, C. Désert, A. Djari, D. Esquerré *et al.*, 2014 Re-sequencing data for  
534 refining candidate genes and polymorphisms in QTL regions affecting adiposity in  
535 chicken. *PLoS One* 9: e111299.
- 536 Rubin, C.-J., M. C. Zody, J. Eriksson, J. R. S. Meadows, E. Sherwood *et al.*, 2010 Whole-  
537 genome resequencing reveals loci under selection during chicken domestication. *Nature*  
538 464: 587–591.
- 539 Spain, S. L., and J. C. Barrett, 2015 Strategies for fine-mapping complex traits. *Hum. Mol.*  
540 *Genet.* 24Spain, S: R111–R119.
- 541 Sun, Y., G. Zhao, R. Liu, M. Zheng, Y. Hu *et al.*, 2013 The identification of 14 new genes for  
542 meat quality traits in chicken using a genome-wide association study. *BMC Genomics*  
543 14: 458.
- 544 Venturini, G. C., V. A. R. Cruz, J. O. Rosa, F. Baldi, L. El Faro *et al.*, 2014 Genetic and

- 545 phenotypic parameters of carcass and organ traits of broiler chickens. *funpecrp.com.br*  
546 *Genet. Mol. Res. Genet. Mol. Res* 13: 10294–10300.
- 547 Wang, Y. C., R. R. Jiang, X. T. Kang, Z. J. Li, R. L. Han *et al.*, 2015 Identification of single  
548 nucleotide polymorphisms in the ASB15 gene and their associations with chicken  
549 growth and carcass traits. *funpecrp.com.br Genet. Mol. Res. Genet. Mol. Res* 14: 11377–  
550 11388.
- 551 Xie, L., C. Luo, C. Zhang, R. Zhang, J. Tang *et al.*, 2012 Genome-Wide Association Study  
552 Identified a Narrow Chromosome 1 Region Associated with Chicken Growth Traits (Z.  
553 Liu, Ed.). *PLoS One* 7: e30910.
- 554 Zerbino, D. R., P. Achuthan, W. Akanni, M. R. Amode, D. Barrell *et al.*, 2018 Ensembl 2018.  
555 *Nucleic Acids Res.* 46: D754–D761.
- 556 Zhou, L., H. Wu, P. Lee, and Z. Wang, 2006 Roles of the androgen receptor cofactor p44 in  
557 the growth of prostate epithelial cells. *J. Mol. Endocrinol.* 37: 283–300.

**Table S1. Characterization of genomic windows identified in genome wide association analysis for the studied traits.**

| Trait       | GGA_Mb <sup>a</sup> | Start – end positions<br>(Chr_SNP) | SNPs <sup>b</sup> | %GV <sup>c</sup> | PPA<br>(p>0) <sup>d</sup> |
|-------------|---------------------|------------------------------------|-------------------|------------------|---------------------------|
| <b>DRW</b>  | 1_166               | 1_166000511 - 1_166999195          | 390               | 3.20             | 0.92                      |
|             | 26_3                | 26_3000141 - 26_3998650            | 998               | 0.22             | 0.94                      |
| <b>DR%</b>  | 1_166               | 1_166000511 - 1_166999195          | 390               | 2.79             | 0.93                      |
|             | 26_3                | 26_3000141 - 26_3998650            | 998               | 0.25             | 0.95                      |
| <b>THW</b>  | 1_166               | 1_166000511 - 1_166999195          | 390               | 0.20             | 0.71                      |
|             | 22_4                | 22_4000760 - 22_4676714            | 1035              | 0.54             | 0.95                      |
|             | 26_1                | 26_1002598 - 26_1999851            | 662               | 0.11             | 0.84                      |
| <b>TH%</b>  | 1_166               | 1_166000511 - 1_166999195          | 390               | 0.14             | 0.71                      |
|             | 22_4                | 22_4000760 - 22_4676714            | 1035              | 0.57             | 0.97                      |
|             | 25_1                | 25_1000996 - 25_1982441            | 691               | 0.11             | 0.85                      |
|             | 26_1                | 26_1002598 - 26_1999851            | 662               | 0.14             | 0.85                      |
| <b>BRW</b>  | 25_1                | 25_1000996 - 25_1982441            | 691               | 0.24             | 0.88                      |
|             | 25_2                | 25_2001192 - 25_2887176            | 512               | 0.81             | 0.88                      |
|             | 26_3                | 26_3000141 - 26_3998650            | 998               | 0.53             | 0.96                      |
| <b>BR%</b>  | 25_1                | 25_1000996 - 25_1982441            | 691               | 0.24             | 0.90                      |
|             | 25_2                | 25_2001192 - 25_2887176            | 512               | 0.6              | 0.84                      |
|             | 26_3                | 26_3000141 - 26_3998650            | 998               | 0.86             | 0.98                      |
| <b>ABFW</b> | 26_1                | 26_1002598 - 26_1999851            | 662               | 1.06             | 0.95                      |
| <b>ABF%</b> | 25_1                | 25_1000996 - 25_1982441            | 691               | 0.23             | 0.87                      |
|             | 26_1                | 26_1002598 - 26_1999851            | 662               | 0.54             | 0.92                      |

<sup>a</sup>Map position based on Gallus\_gallus-5.0 NCBI assembly; <sup>b</sup>Number of SNPs per region; <sup>c</sup>% of genetic variance explained by the window; <sup>d</sup>Posterior probability of association (PPA) as reported by Onteru et al. (2013). DRW: drumstick weight; DR%: drumstick yield; THW: thigh weight; TW%: thigh yield; BTW: breast weight; BT%: breast yield; ABFW: abdominal fat weight; ABF%: abdominal fat yield;
